# Supplementary material for: Effect of the Sodium-Glucose Cotransporter 2 Inhibitor Canagliflozin for Heart Failure With Preserved Ejection Fraction in Patients With Type 2 Diabetes
Source: PubMed Central journal article supplement — Circ Rep. 2021 Jul 22;3(8):440–8. doi: 10.1253/circrep.CR-21-0030 (PMC8338435; doi:10.1253/circrep.cr-21-0030), 2021-07-22
Supplement: circrep-3-440-s001.pdf [file circrep-3-440-s001.pdf]

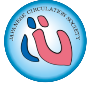

---

## **Effect of the Sodium-Glucose Cotransporter 2 Inhibitor Canagliflozin for Heart Failure With Preserved Ejection Fraction in Patients With Type 2 Diabetes**

---

Tomoya Ueda, MD, PhD; Shu Kasama, MD, PhD; Masahiro Yamamoto, MD, PhD;  
Tomoya Nakano, MD, PhD; Kazuhiro Ueshima, MD; Yoshinobu Morikawa, MD, PhD;  
Hiroyuki Kawata, MD, PhD; Akiomi Yoshihisa, MD, PhD; Masafumi Nakayama, MD, PhD;  
Sei Komatsu, MD, PhD; Tsunenari Soeda, MD, PhD; Makoto Watanabe, MD, PhD;  
Rika Kawakami, MD, PhD; Yasushi Okada, BSc; Hiroyuki Tanaka, BSc; Yutaka Susuta, PhD;  
Masato Kasahara, MD, PhD; Kenichi Tsujita, MD, PhD; Yasuchika Takeishi, MD, PhD;  
Yoshihiko Saito, MD, PhD; CANONICAL Study Group

**Supplementary Table 1. Body Weight and Plasma BNP Levels at 4, 12, and 24 Weeks After Treatment**

|                          | <b>CAN<br/>(n=42)</b> | <b>STDT<br/>(n=40)</b> | <b>P value</b> |
|--------------------------|-----------------------|------------------------|----------------|
| <b>Body weight, kg</b>   |                       |                        |                |
| Baseline                 | 62.89±10.96           | 63.90±11.38            | 0.6853         |
| 4 weeks                  | 61.43±10.85           | 64.26±11.17            | 0.2538         |
| 12 weeks                 | 62.11±10.65           | 63.34±11.22            | 0.4464         |
| 24 weeks                 | 61.07±10.99           | 63.08±11.47            | 0.3398         |
| <b>Plasma BNP, pg/mL</b> |                       |                        |                |
| Baseline                 | 134 (75–213)          | 130 (93-219)           | 0.5186         |
| 4 weeks                  | 98 (57-215)           | 144 (93-239)           | 0.0522         |
| 12 weeks                 | 97 (54-214)           | 137 (99-219)           | 0.1660         |
| 24 weeks                 | 102 (58-206)          | 160 (85-249)           | 0.2828         |

Body weight and Plasma BNP data are shown as the mean ± standard deviation and median (25th-75th percentile), respectively.

BNP, B-type natriuretic peptide.

**Supplementary Table 2. Systolic Blood Pressure, Diastolic Blood Pressure and Heart Rate at 4, 12, and 24 Weeks After Treatment**

|                                       | <b>CAN<br/>(n=42)</b> | <b>STDT<br/>(n=40)</b> | <b>P value</b> |
|---------------------------------------|-----------------------|------------------------|----------------|
| <b>Systolic blood pressure, mmHg</b>  |                       |                        |                |
| Baseline                              | 131.1±14.6            | 131.5±16.2             | 0.9109         |
| 4 weeks                               | 130.8±15.3            | 128.3±15.2             | 0.4660         |
| 12 weeks                              | 126.3±17.5            | 126.3±16.6             | 0.9910         |
| 24 weeks                              | 126.0±14.7            | 127.9±17.1             | 0.5940         |
| <b>Diastolic blood pressure, mmHg</b> |                       |                        |                |
| Baseline                              | 71.6±12.1             | 70.0±10.5              | 0.2959         |
| 4 weeks                               | 71.4±10.0             | 66.8±12.2              | 0.0650         |
| 12 weeks                              | 70.9±12.2             | 66.7±13.3              | 0.1589         |
| 24 weeks                              | 70.4±11.8             | 68.2±12.4              | 0.4154         |
| <b>Heart rate, beats/minute</b>       |                       |                        |                |
| Baseline                              | 70.5±11.0             | 67.4±10.9              | 0.1996         |
| 4 weeks                               | 71.5±11.9             | 67.6±10.9              | 0.1285         |
| 12 weeks                              | 71.3±17.3             | 66.0±10.1              | 0.1056         |
| 24 weeks                              | 72.0±12.5             | 66.9±10.2              | 0.0558         |

Data are shown as the mean ± standard deviation.

## **CANONICAL Study Group Member**

### **Nara Medical University**

Tomoya Ueda, Yoshihiko Saito, Kazutaka Nogi, Azusa Sakagami, Hiroki Yano, Yasuki Nakata, Yukihiro Hashimoto, Akihiro Takitsume, Hitoshi Nakagawa, Taku Nishida, Kenji Onoue, Tsunenari Soeda, Makoto Watanabe, Rika Kawakami.

### **Graduate School of Medical Sciences, Kumamoto University**

Masahiro Yamamoto, Kenichi Tsujita

### **Yamato Takada Municipal Hospital**

Tomoya Nakano, Kazuhiro Ueshima

### **Minami-Nara General Medical Center**

Yoshinobu Morikawa

### **Nara Prefecture General Medical Center**

Takuya Nakamura, Hiroyuki Kawata

### **Fukushima Medical University**

Akiomi Yoshihisa, Yasuchika Takeishi

### **Nakayama Cardiovascular Clinic**

Masafumi Nakayama

### **Osaka Gyomeikan Hospital**

Sei Komatsu

### **National Cerebral and Cardiovascular Center**

Hiroyuki Takahama, Satoshi Yasuda

### **Hyogo College of Medicine College**

Masanori Asakura

### **Osaka University**

Tomohito Ohtani, Yasushi Sakata

### **Nara Prefecture Seiwa Medical Center**

Takehito Nakai, Naofumi Doi

**Shinshu University**

Hirohiko Motoki, Koichiro Kuwahara

**Tottori University Hospital**

Kazuhiro Yamamoto

**Gunma University Hospital**

Noriaki Takama

**Rakuwakai Marutamachi Hospital**

Ichiro Hamanaka

**Nara City Hospital**

Manabu Horii

**Hiramitsu Heart Clinic**

Shinya Hiramitsu

**Onishi Heart Clinic**

Katsuya Onishi

**Clinic Jingu-mae**

Takeshi Takami
